# Supplementary material for: Value representations in the rodent orbitofrontal cortex drive learning, not choice
Source: eLife journal article supplement (doi:10.7554/elife.64575), 2022-08-17

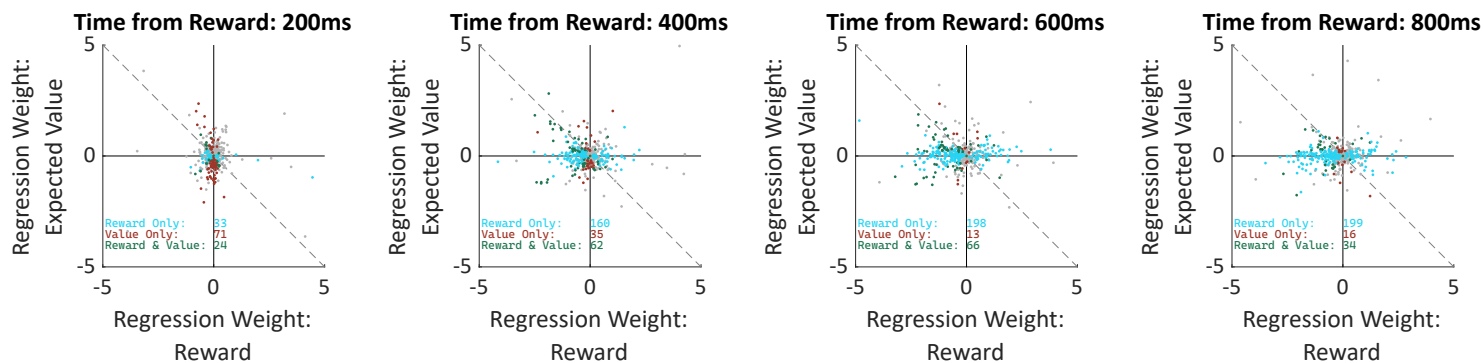

**Example Unit: Expected Value and Reward**  
Consistent with RPE: Responds most strongly to surprising omissions

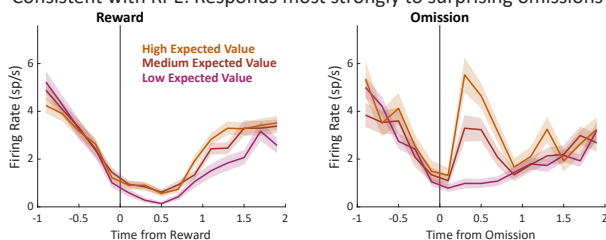

**Example Unit: Expected Value and Reward**  
Not consistent with RPE: Responds most strongly to expected omissions

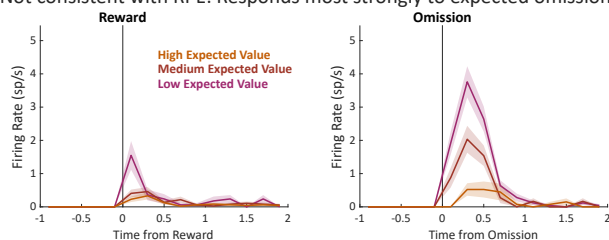

**Example Unit: Expected Value Only**

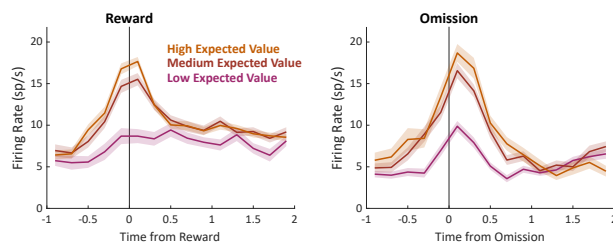

Supplement: supp [file elife_poa_e64575_Figure_4_figure_supplement_8.pdf › elife_poa_e64575_Figure_4_figure_supplement_8.pdf]
