# Supplementary figures and images for: Value representations in the rodent orbitofrontal cortex drive learning, not choice
Source: eLife journal article supplement (doi:10.7554/elife.64575), 2022-08-17

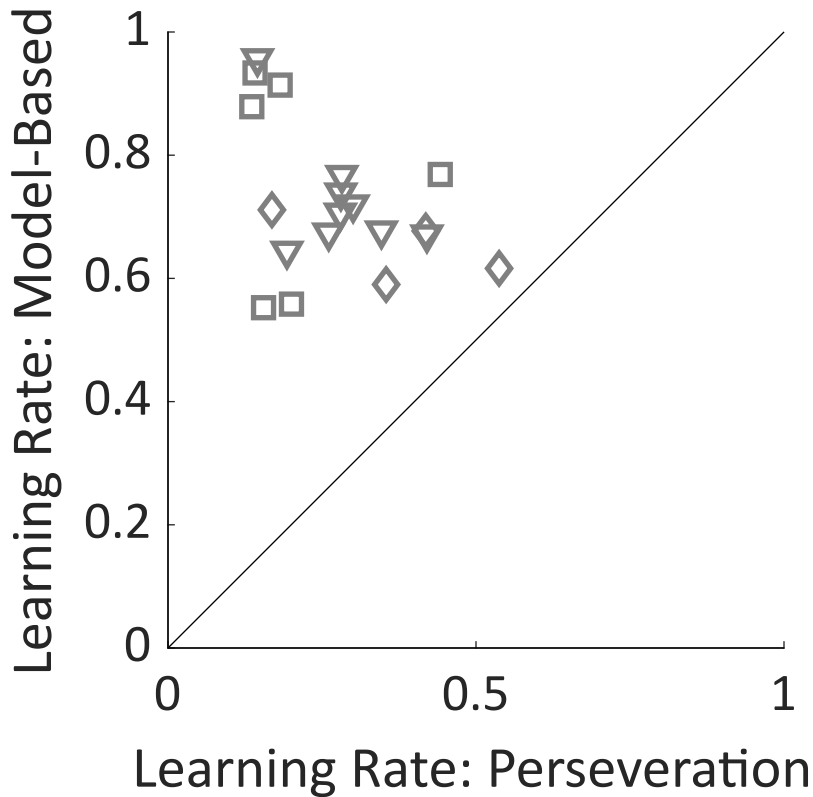

Supplement: supp [file elife_poa_e64575_Figure_2_figure_supplement_1.pdf › elife_poa_e64575_Figure_2_figure_supplement_1.pdf]

# Electrophysiology Rats

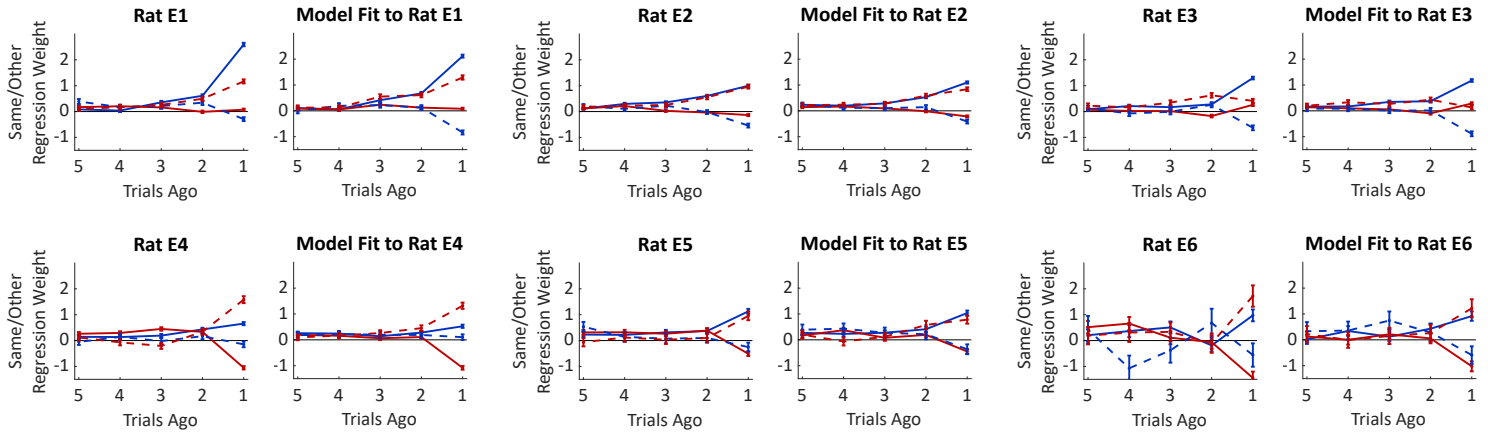

# Optogenetics Rats

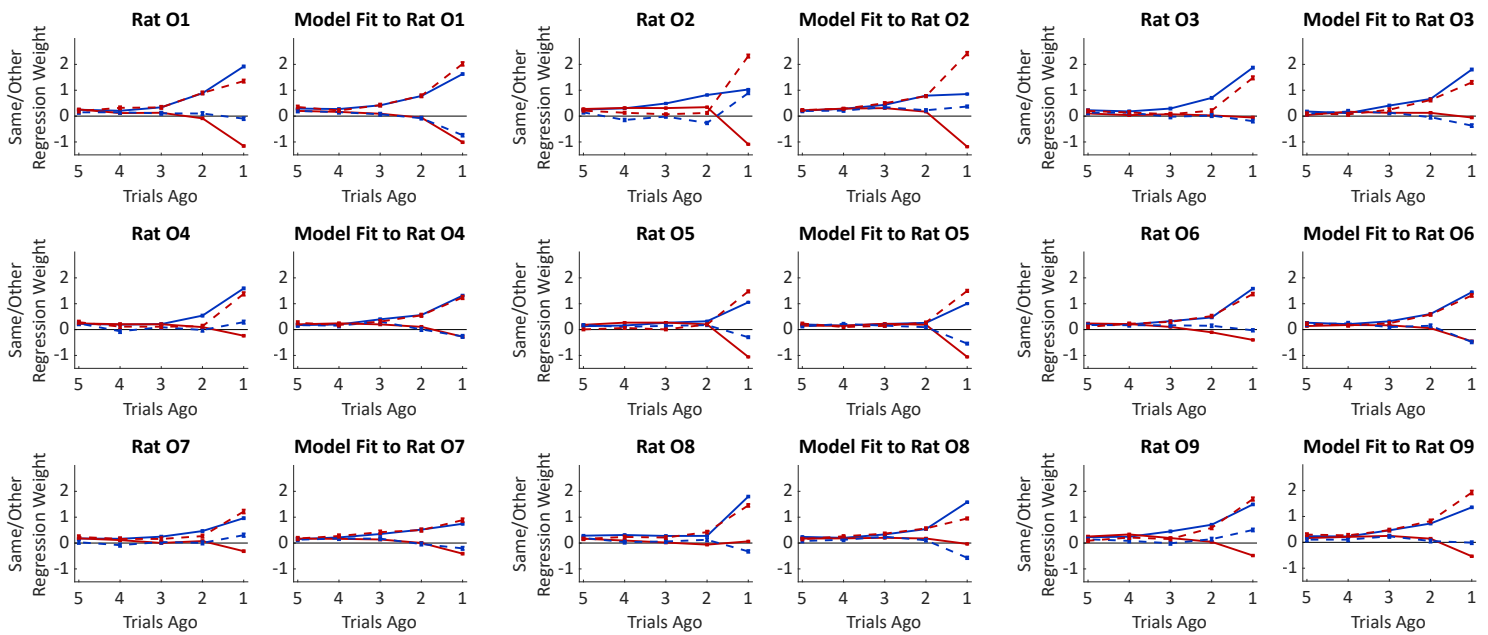

# Sham Optogenetics Rats

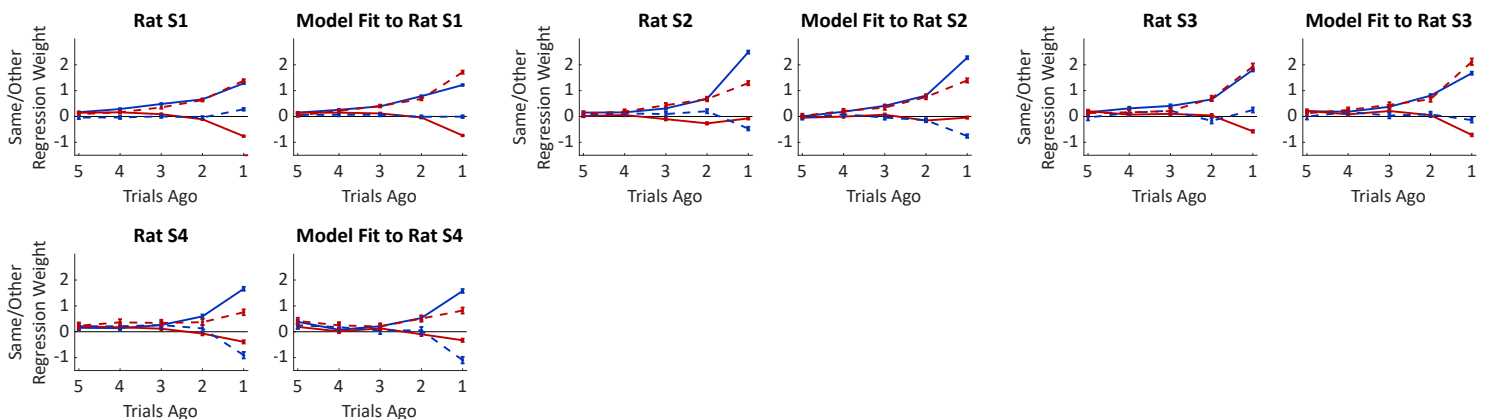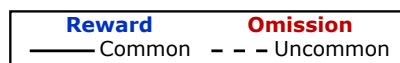

Supplement: supp [file elife_poa_e64575_Figure_2_figure_supplement_2.pdf › elife_poa_e64575_Figure_2_figure_supplement_2.pdf]

Example Histology Image:  
Recording Array

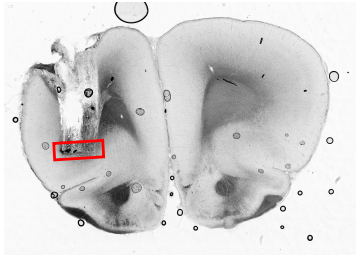

Brightfield

Supplement: supp [file elife_poa_e64575_Figure_3_figure_supplement_1.pdf › elife_poa_e64575_Figure_3_figure_supplement_1.pdf]

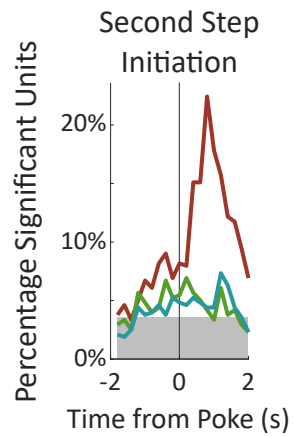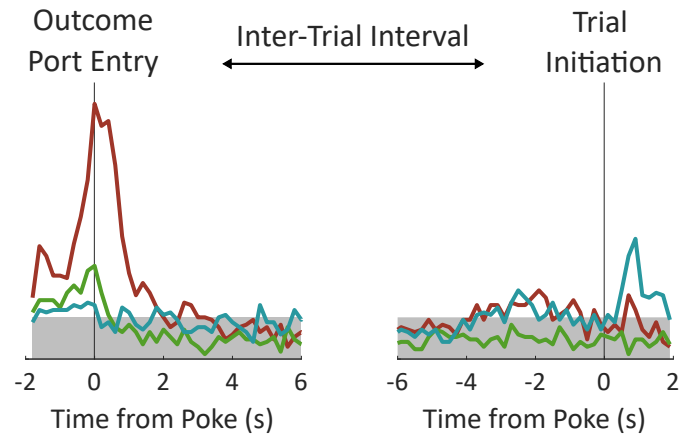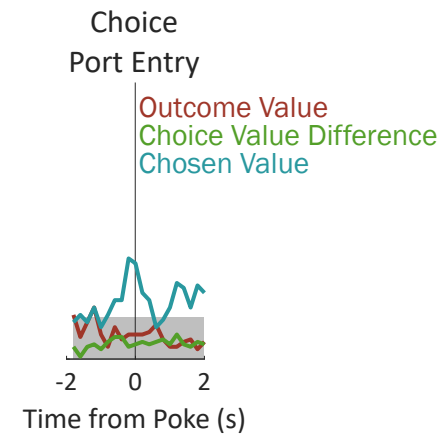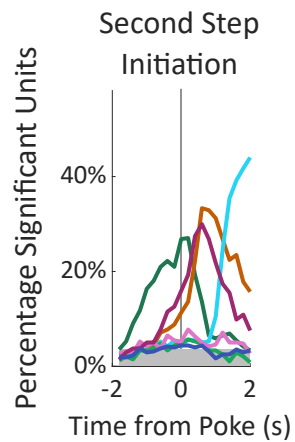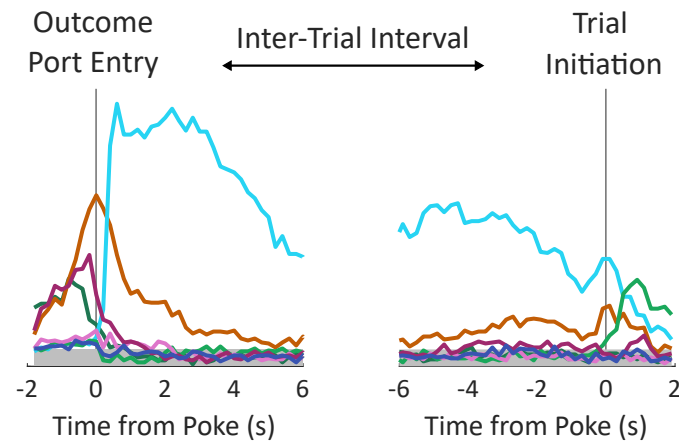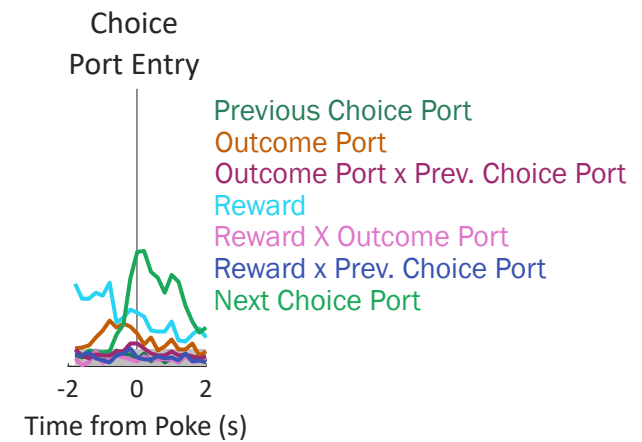

Supplement: supp [file elife_poa_e64575_Figure_4_figure_supplement_1.pdf › elife_poa_e64575_Figure_4_figure_supplement_1.pdf]

## Single-Unit Clusters

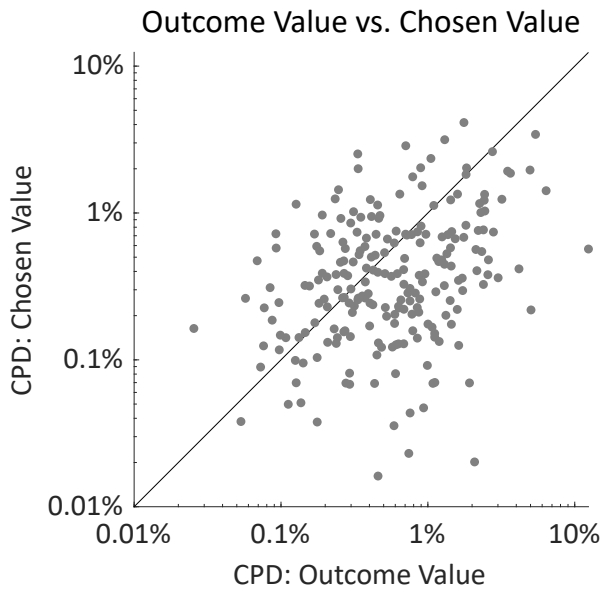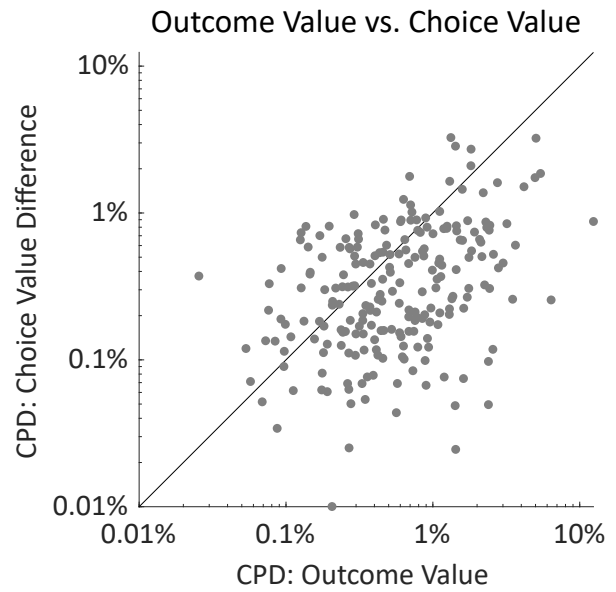

## Multi-Unit Clusters

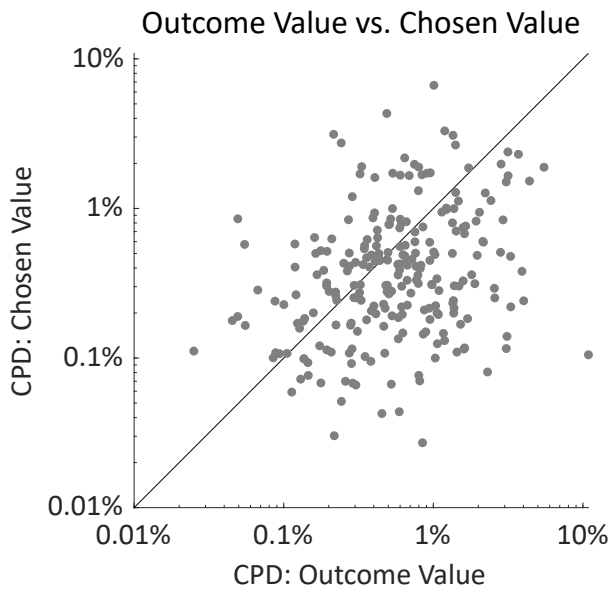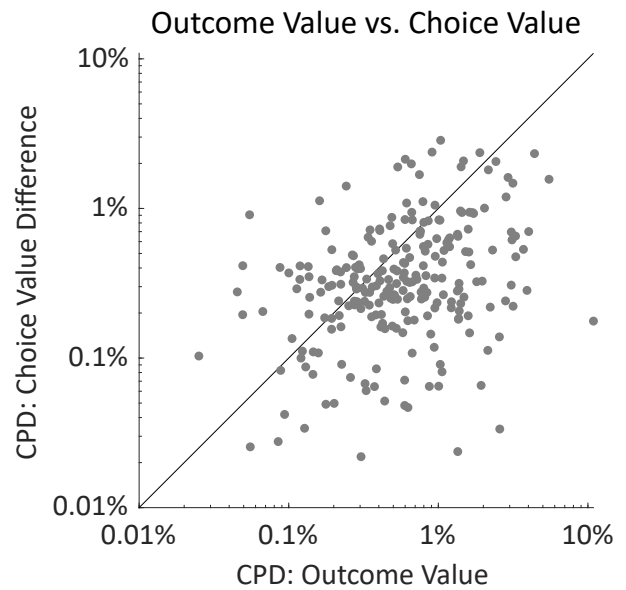

Supplement: supp [file elife_poa_e64575_Figure_4_figure_supplement_2.pdf › elife_poa_e64575_Figure_4_figure_supplement_2.pdf]

## Single-Unit Clusters

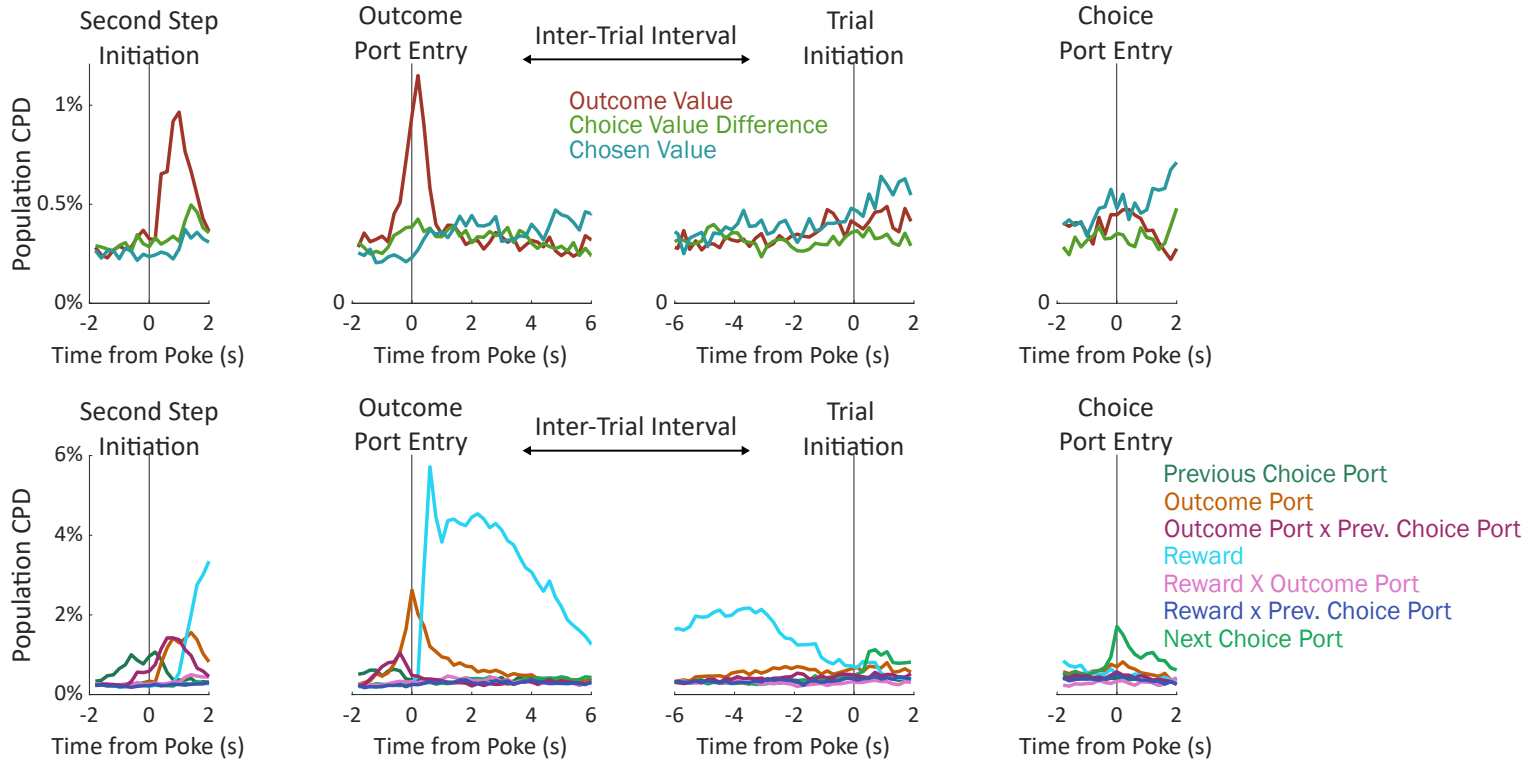

## Multi-Unit Clusters

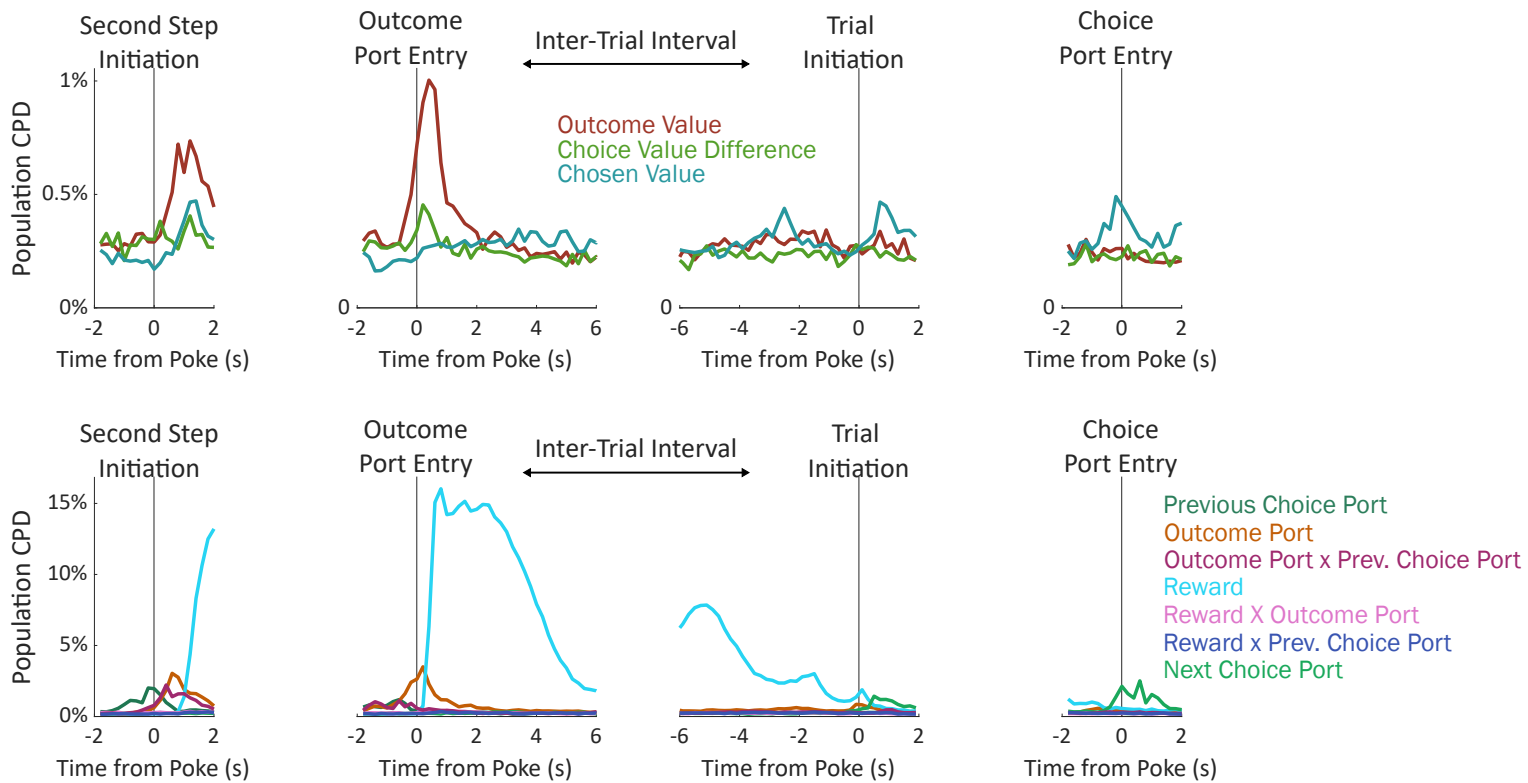

Supplement: supp [file elife_poa_e64575_Figure_4_figure_supplement_3.pdf › elife_poa_e64575_Figure_4_figure_supplement_3.pdf]

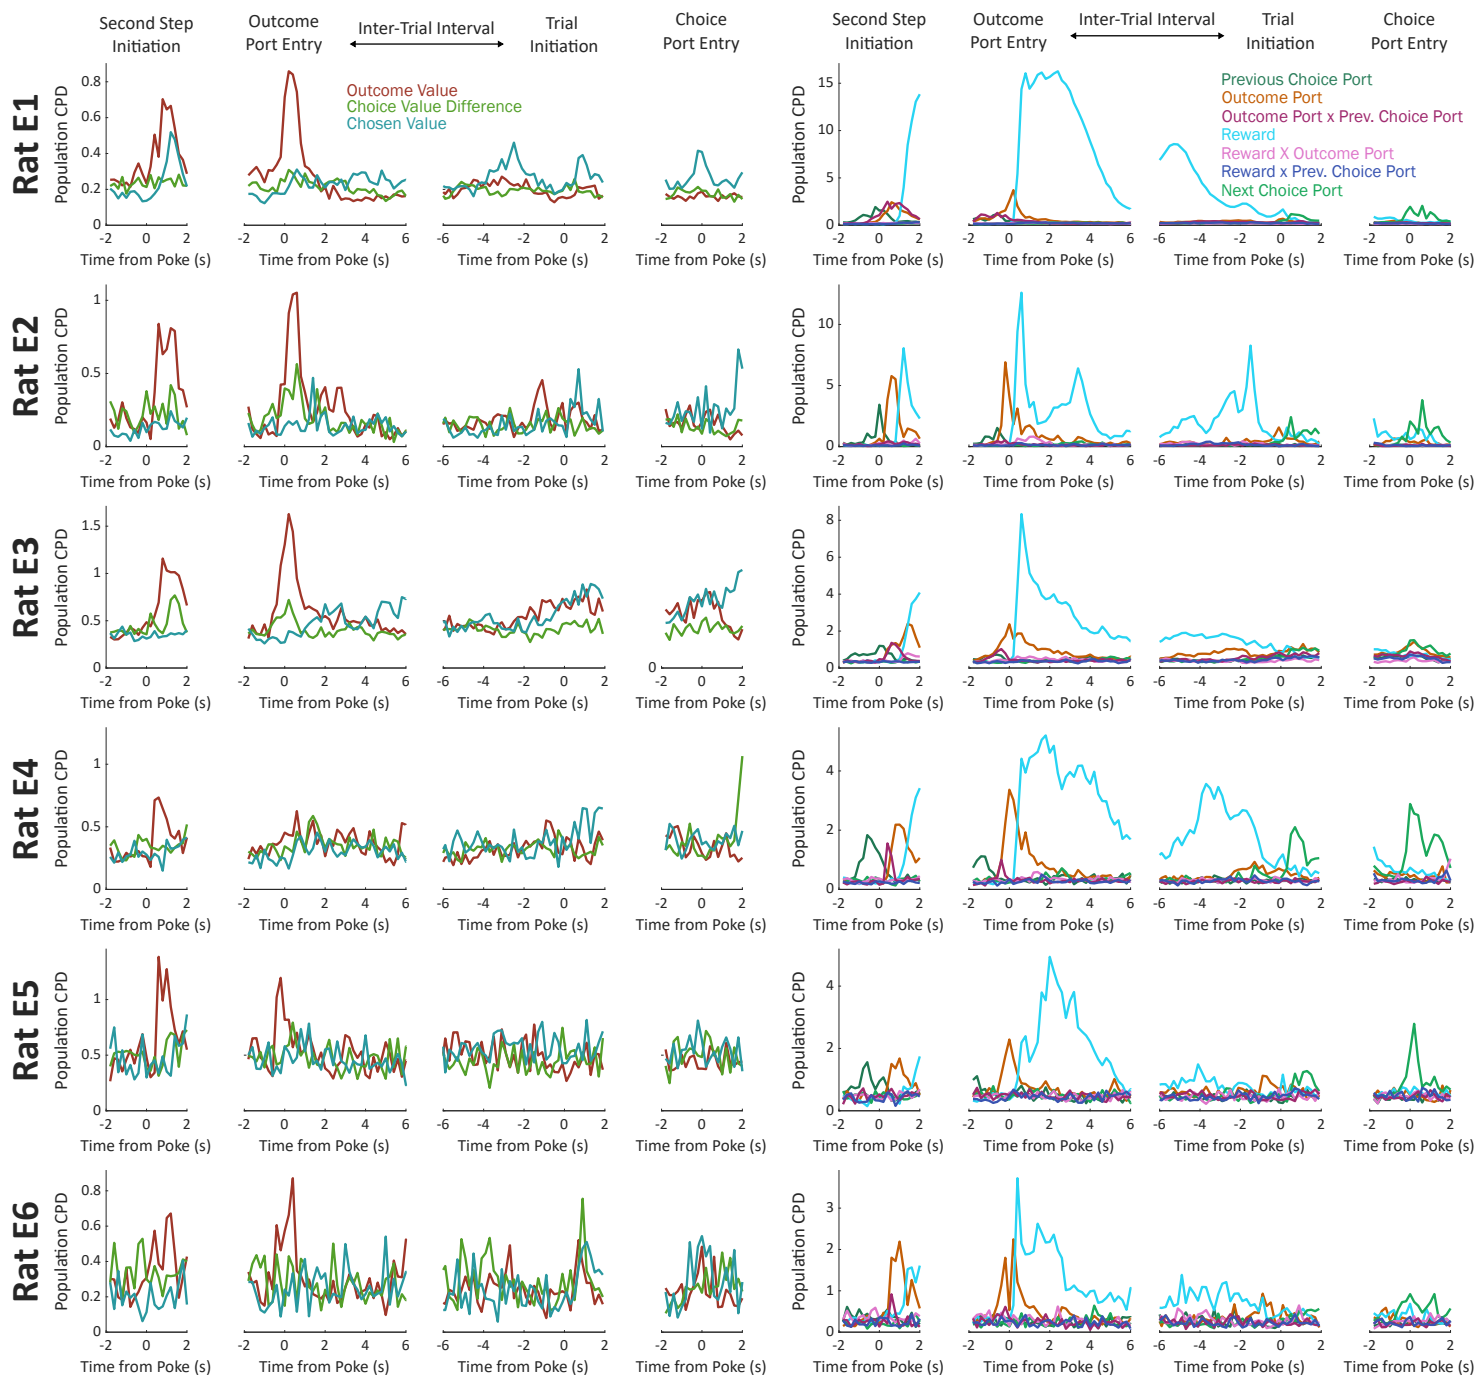

|                      | Rat E1 | Rat E2 | Rat E3 | Rat E4 | Rat E5 | Rat E6 |
|----------------------|--------|--------|--------|--------|--------|--------|
| Single-Unit Clusters | 89     | 12     | 67     | 11     | 35     | 12     |
| Multi-Unit Clusters  | 63     | 2      | 121    | 56     | 5      | 4      |

Supplement: supp [file elife_poa_e64575_Figure_4_figure_supplement_4.pdf › elife_poa_e64575_Figure_4_figure_supplement_4.pdf]

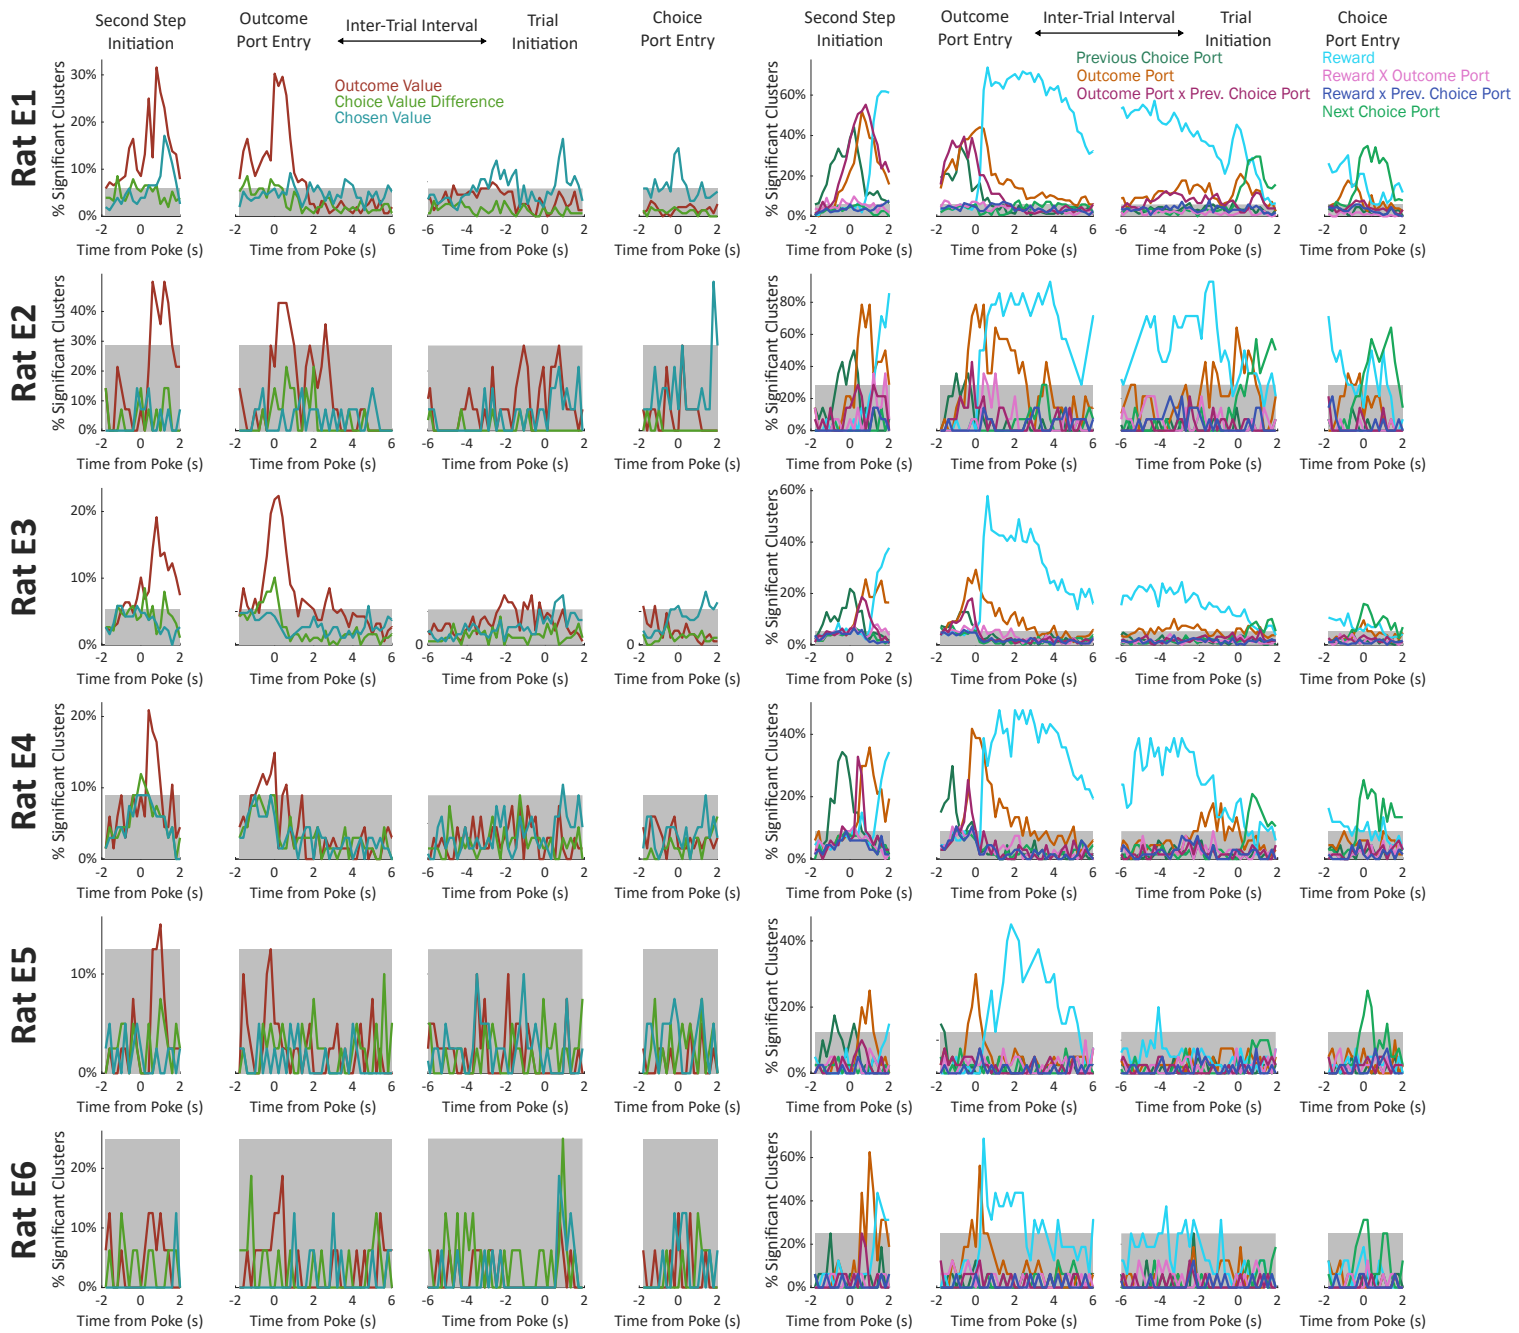

|                      | Rat E1 | Rat E2 | Rat E3 | Rat E4 | Rat E5 | Rat E6 |
|----------------------|--------|--------|--------|--------|--------|--------|
| Single-Unit Clusters | 89     | 12     | 67     | 11     | 35     | 12     |
| Multi-Unit Clusters  | 63     | 2      | 121    | 56     | 5      | 4      |

Supplement: supp [file elife_poa_e64575_Figure_4_figure_supplement_5.pdf › elife_poa_e64575_Figure_4_figure_supplement_5.pdf]

# Remove Reward x Outcome Port Regressor

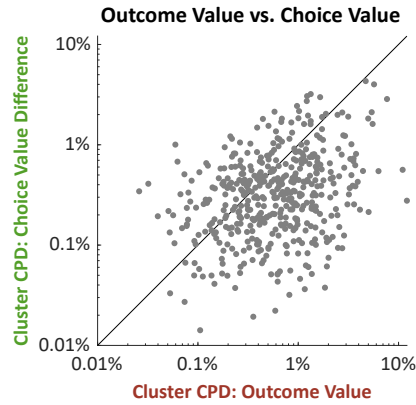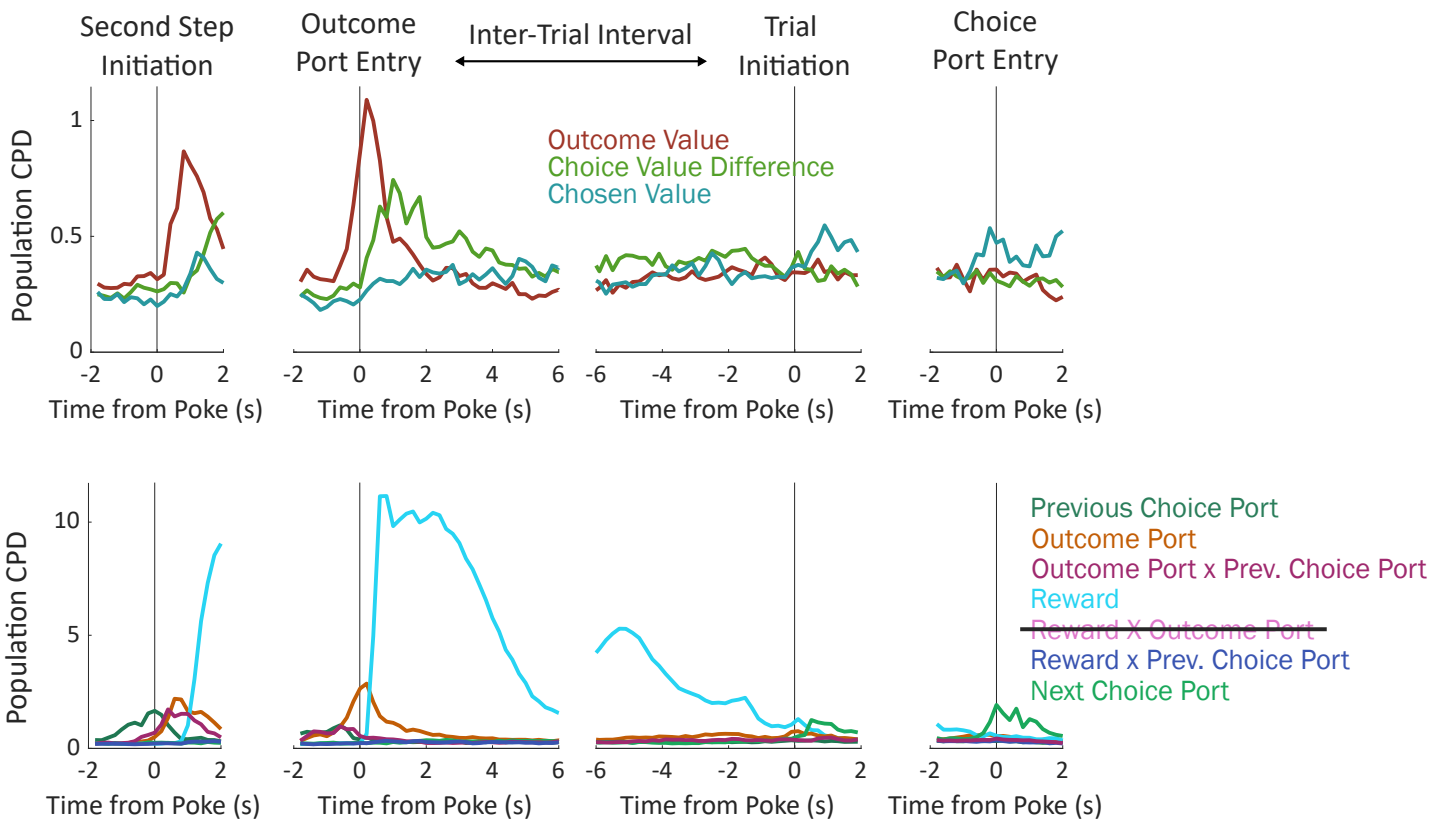

Supplement: supp [file elife_poa_e64575_Figure_4_figure_supplement_6.pdf › elife_poa_e64575_Figure_4_figure_supplement_6.pdf]

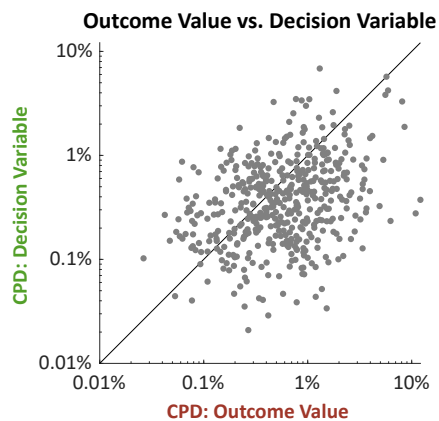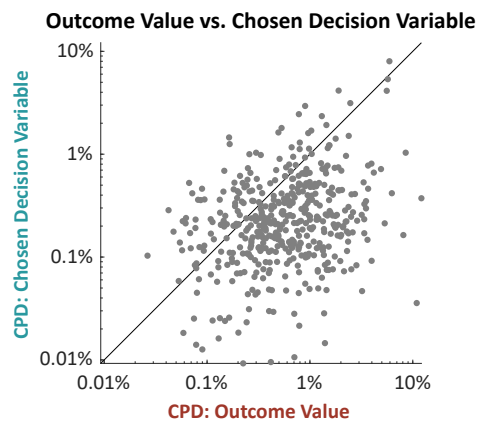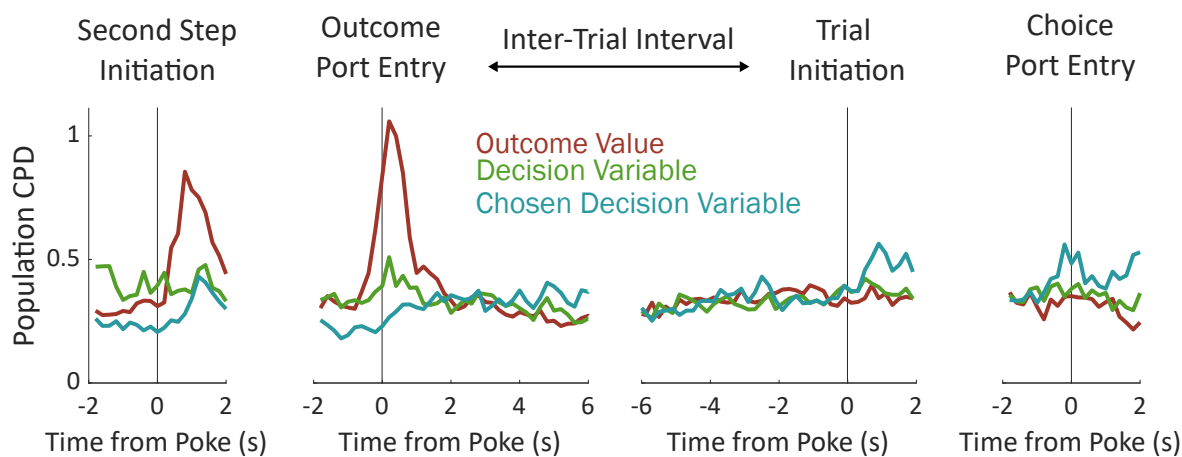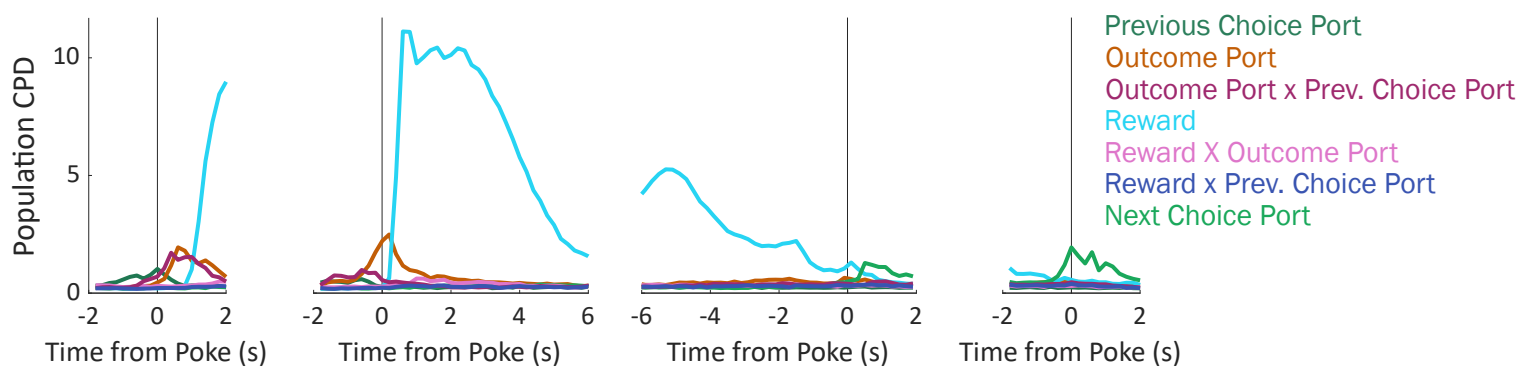

Supplement: supp [file elife_poa_e64575_Figure_4_figure_supplement_7.pdf › elife_poa_e64575_Figure_4_figure_supplement_7.pdf]

## Example Histology Images: Optical Fibers

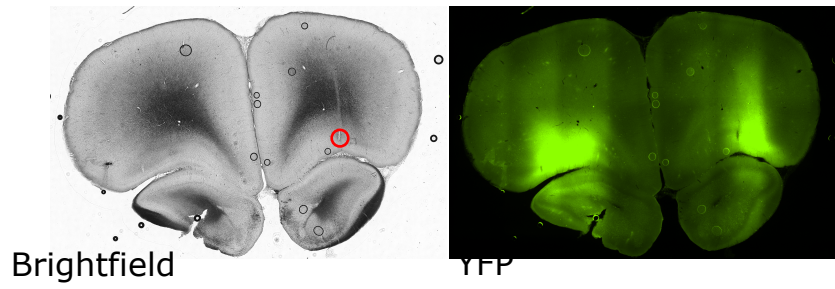

## Approximate Locations of Optical Fibers

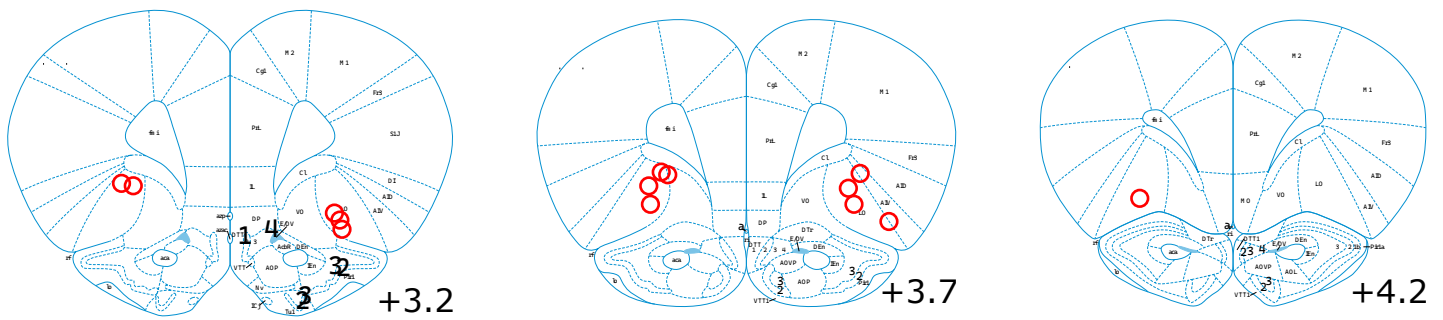

Supplement: supp [file elife_poa_e64575_Figure_5_figure_supplement_1.pdf › elife_poa_e64575_Figure_5_figure_supplement_1.pdf]

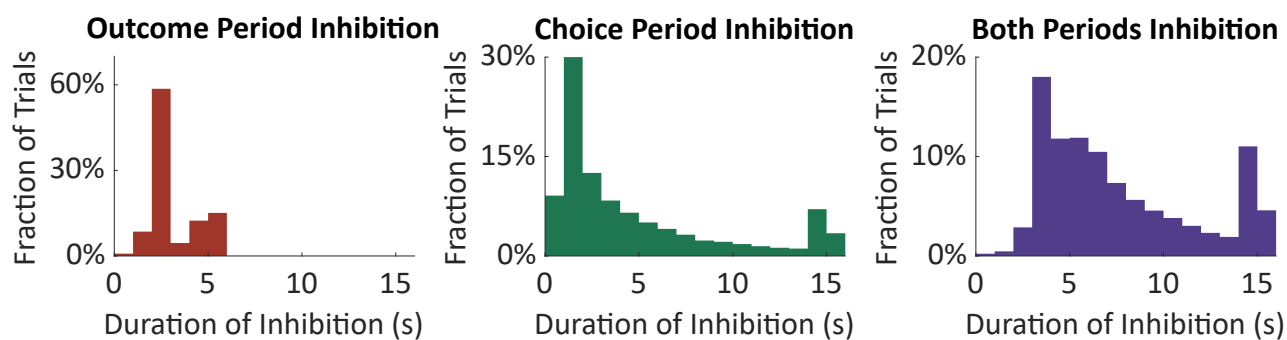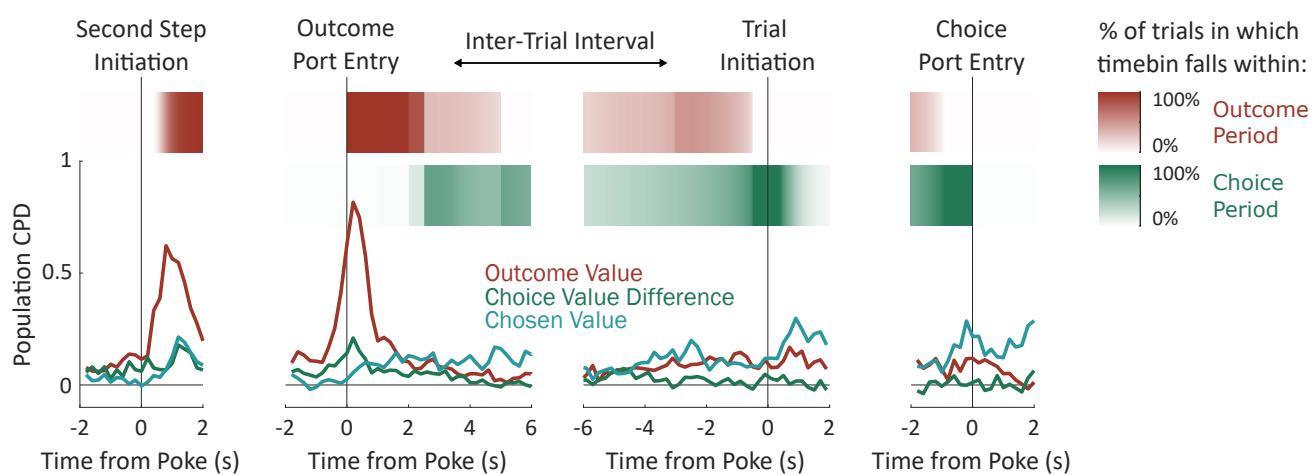

Supplement: supp [file elife_poa_e64575_Figure_5_figure_supplement_2.pdf › elife_poa_e64575_Figure_5_figure_supplement_2.pdf]

## Behavioral Indices: Control Trials

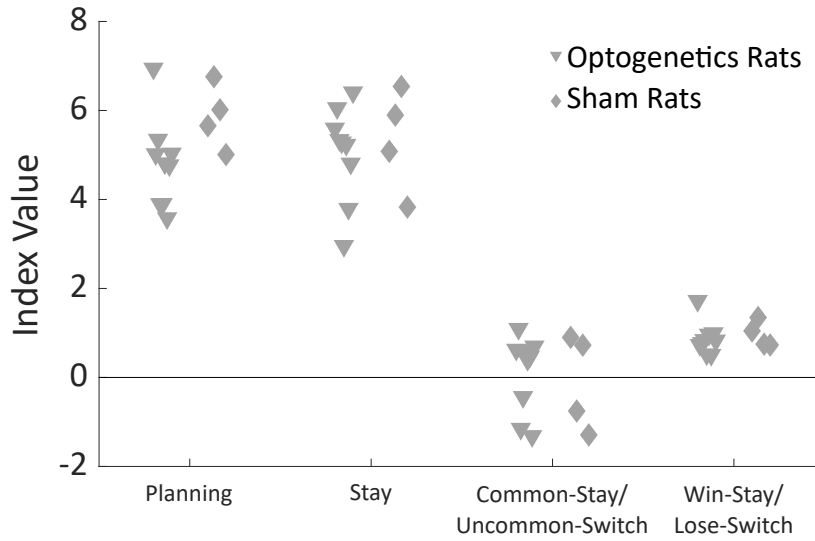

## Effect of Inactivation on Behavioral Indices

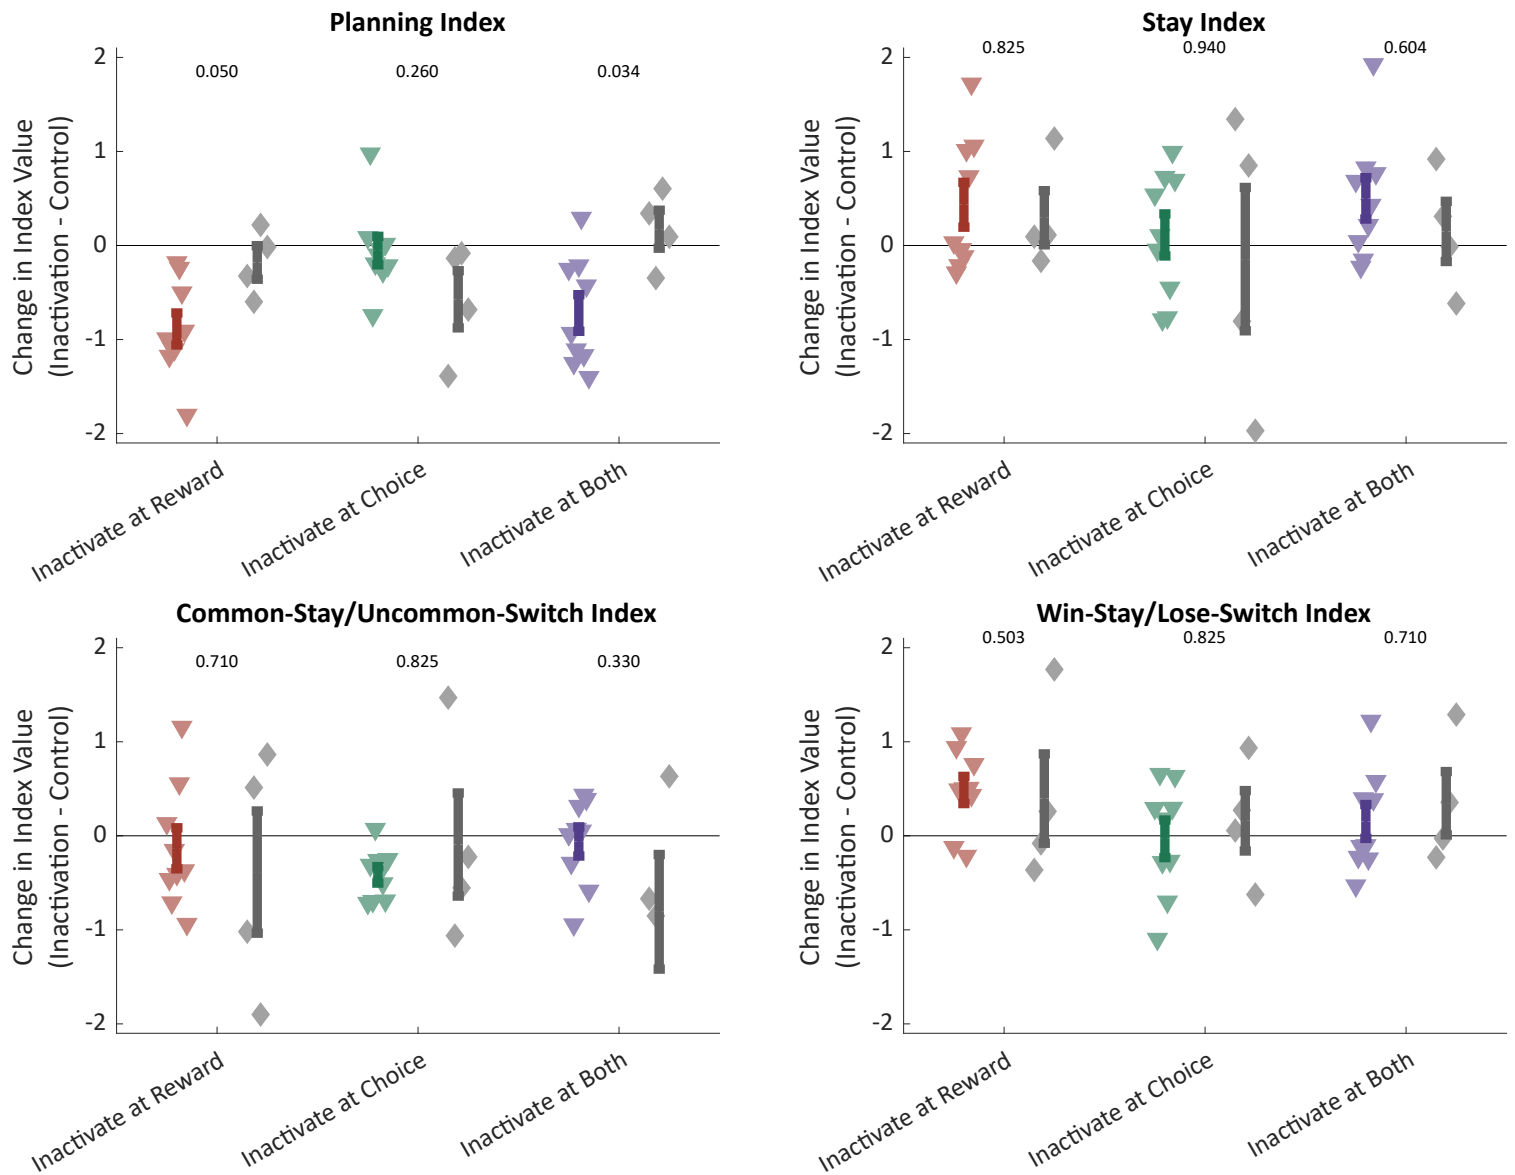

Supplement: supp [file elife_poa_e64575_Figure_5_figure_supplement_3.pdf › elife_poa_e64575_Figure_5_figure_supplement_3.pdf]

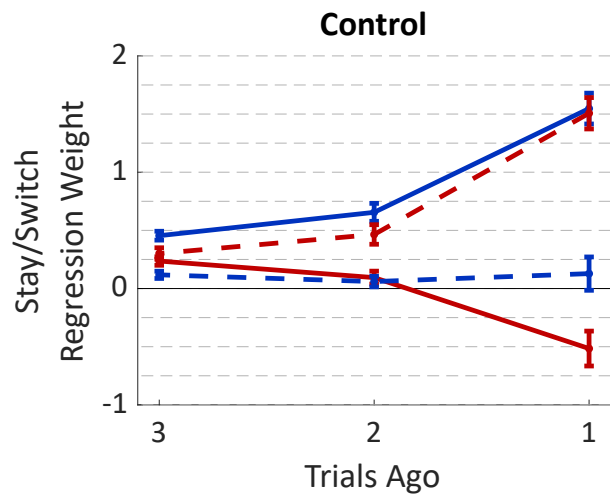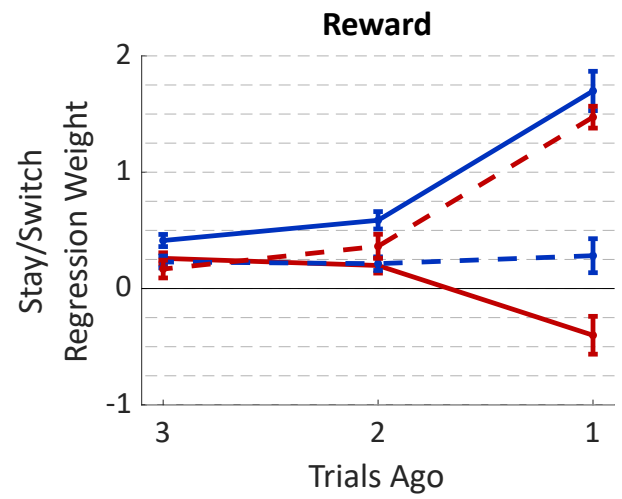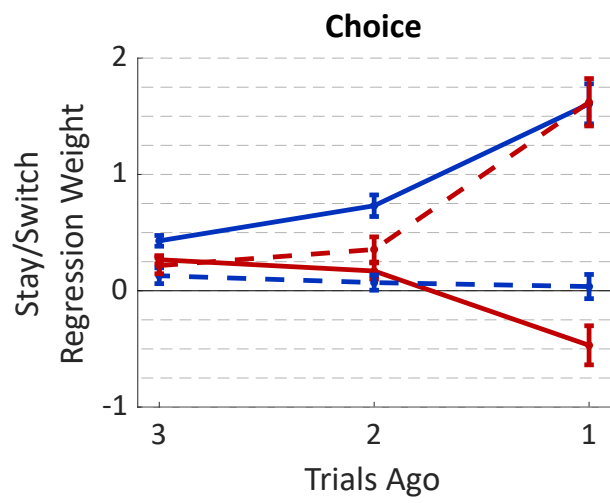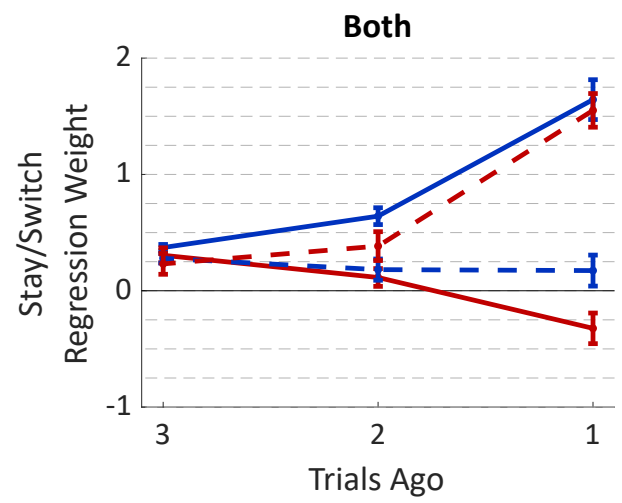

Supplement: supp [file elife_poa_e64575_Figure_5_figure_supplement_4.pdf › elife_poa_e64575_Figure_5_figure_supplement_4.pdf]

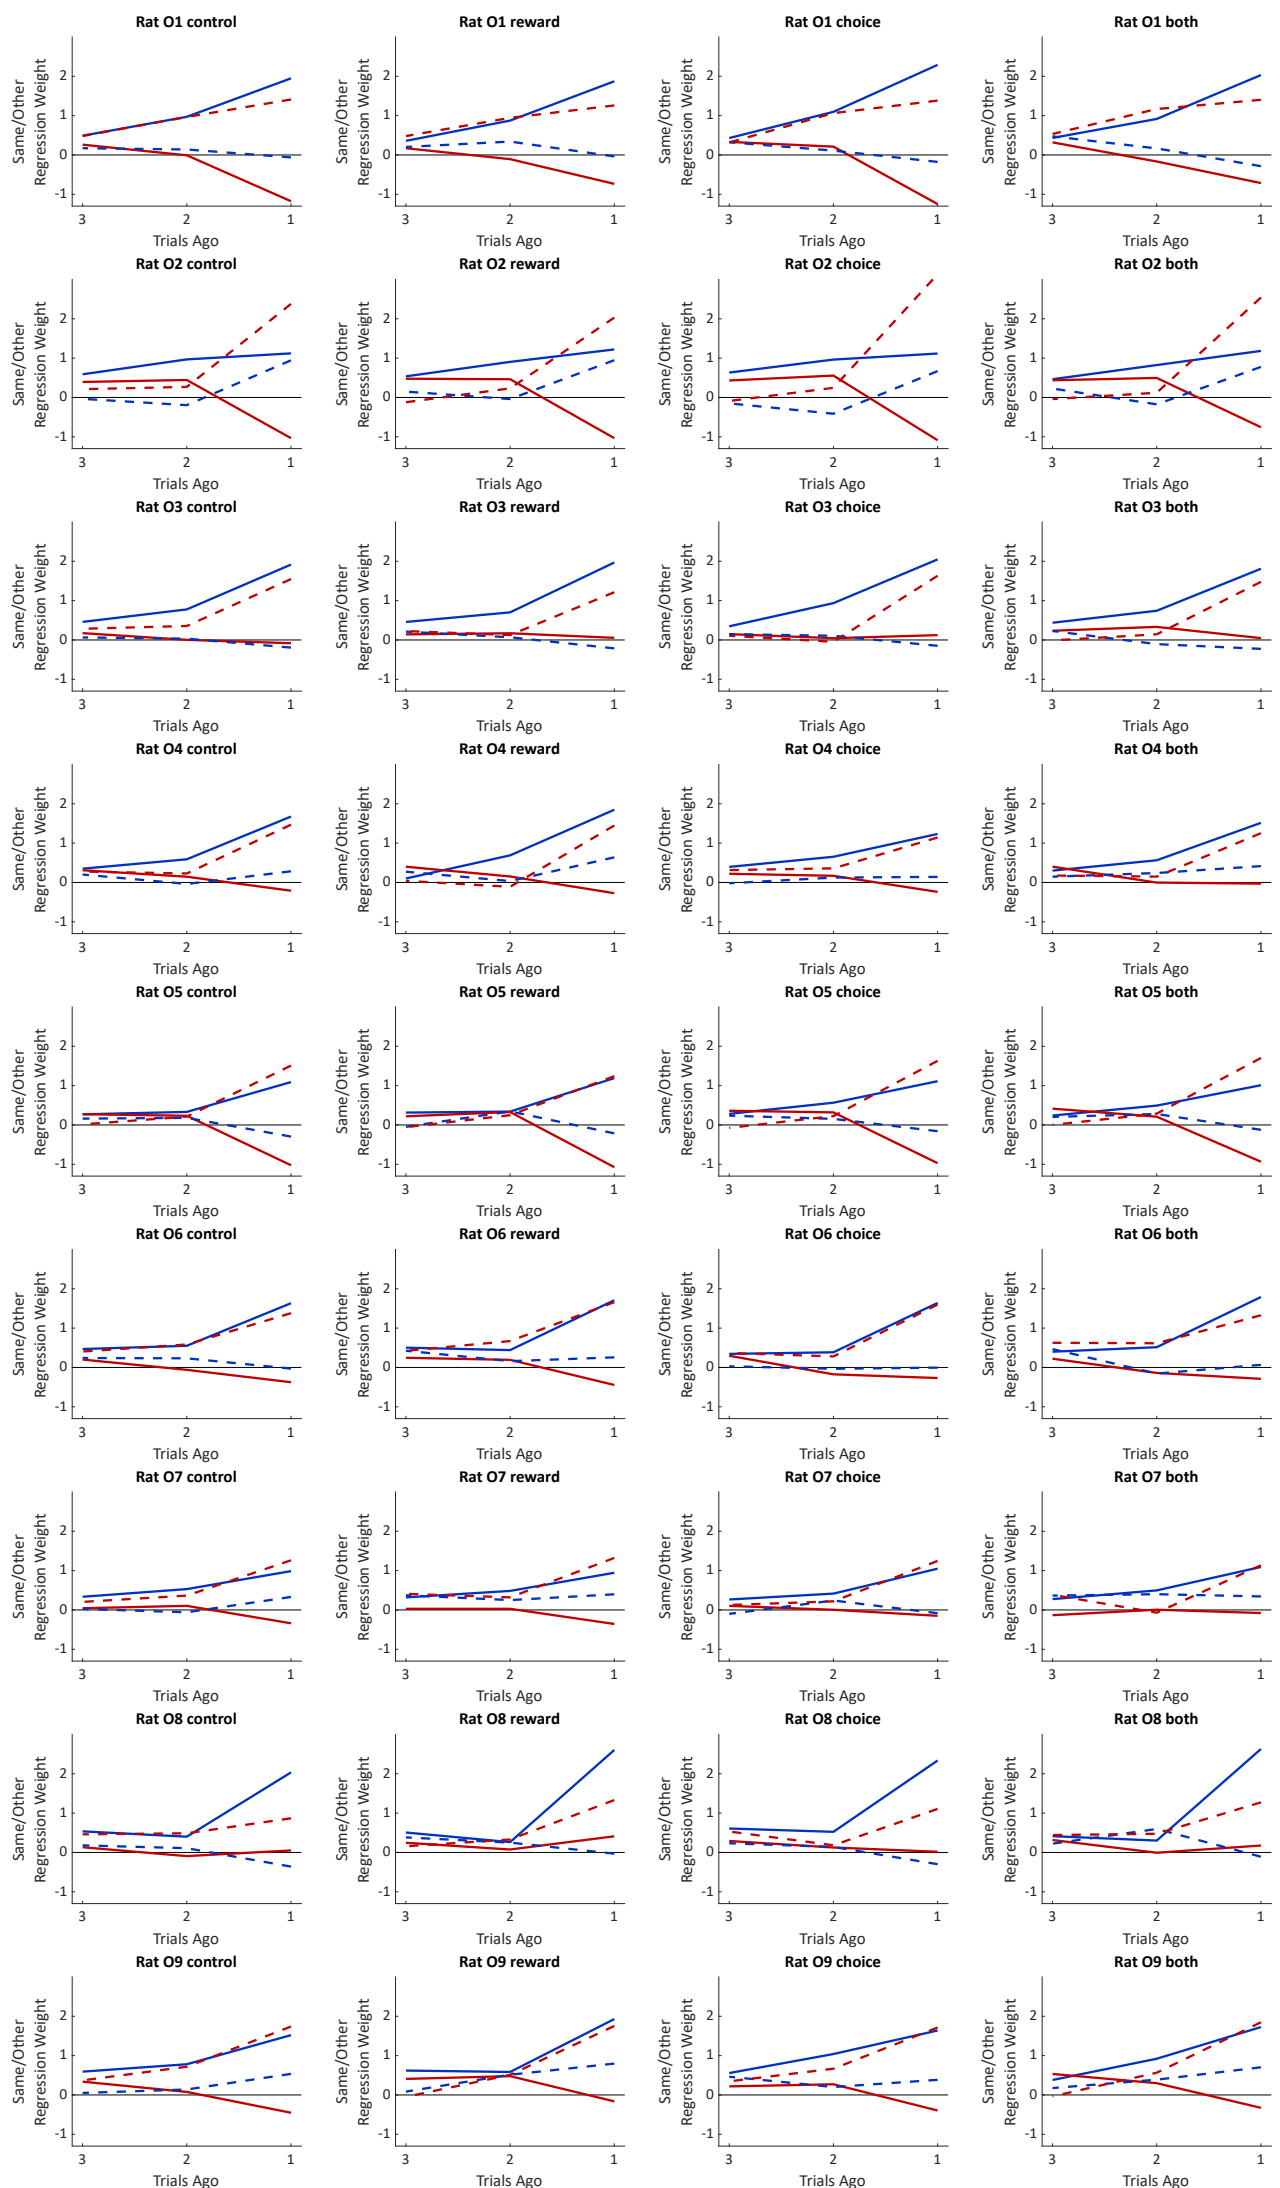

Supplement: supp [file elife_poa_e64575_Figure_5_figure_supplement_5.pdf › elife_poa_e64575_Figure_5_figure_supplement_5.pdf]
